# Supplementary material for: Enhancement of Ti3C2 MXene on Au@Ag/TiO2 for the visible-light-driven photoreduction of nitroaromatics
Source: Royal Society of Chemistry journal article supplement (doi:10.1039/d1ce01468d), 2021-12-08
Supplement: d1ce01468d1.pdf [file d1ce01468d1.pdf]

Supplementary Information for

Enhancement of  $\text{Ti}_3\text{C}_2$  MXene on  $\text{Au@Ag}/\text{TiO}_2$  for the visible-light-  
driven photoreduction of nitroaromatics

Huiqin An<sup>a,\*</sup>, Lifang Cao<sup>a</sup>, Ran Cheng<sup>a</sup>, Xiaoqi Zhang<sup>b</sup>, Saihui Zhang<sup>a</sup>, Yang Sun<sup>a</sup>, Lizhi Zhao<sup>c</sup>,

Bing Wang<sup>a,\*</sup>, Zhen Yin<sup>d,\*</sup>

<sup>a</sup> School of Chemistry, Tiangong University, Tianjin 300387, China

<sup>b</sup> Envirogene Technology (Tianjin) Company Limited by Shares, Tianjin 300384, China

<sup>c</sup> School of Materials Science and Engineering, Tiangong University, Tianjin 300387, China

<sup>d</sup> College of Chemical Engineering and Materials Science, Tianjin University of Science and  
Technology, Tianjin 300457, China

**Email:** anhuiqinhebei@163.com; bingwang@tiangong.edu.cn; yinzhen@tust.edu.cn

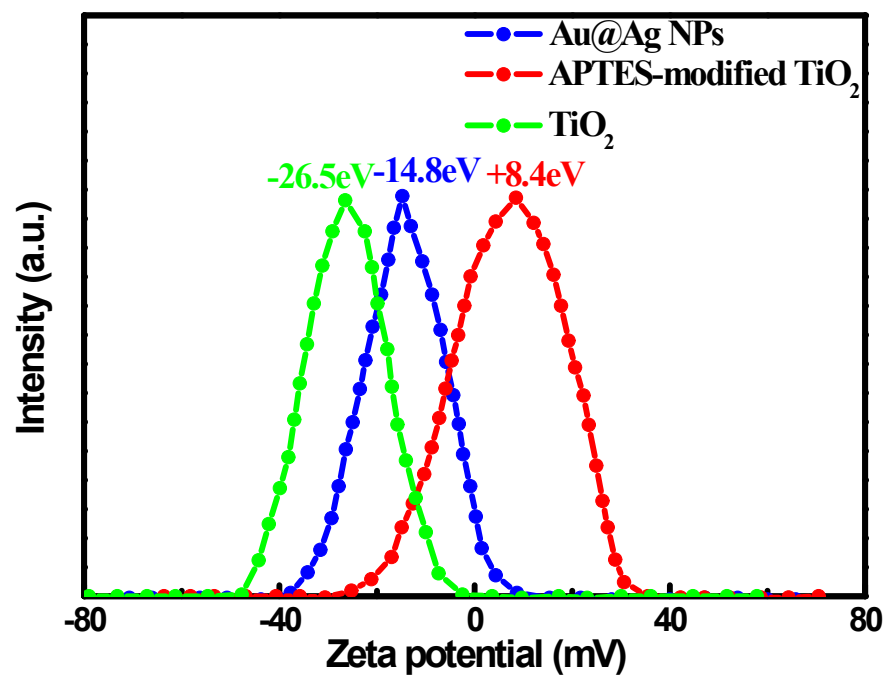

**Figure S1.** Zeta potentials of  $\text{TiO}_2$  microspheres,  $\text{Au@Ag NPs}$  and APTES-modified  $\text{TiO}_2$  microspheres.

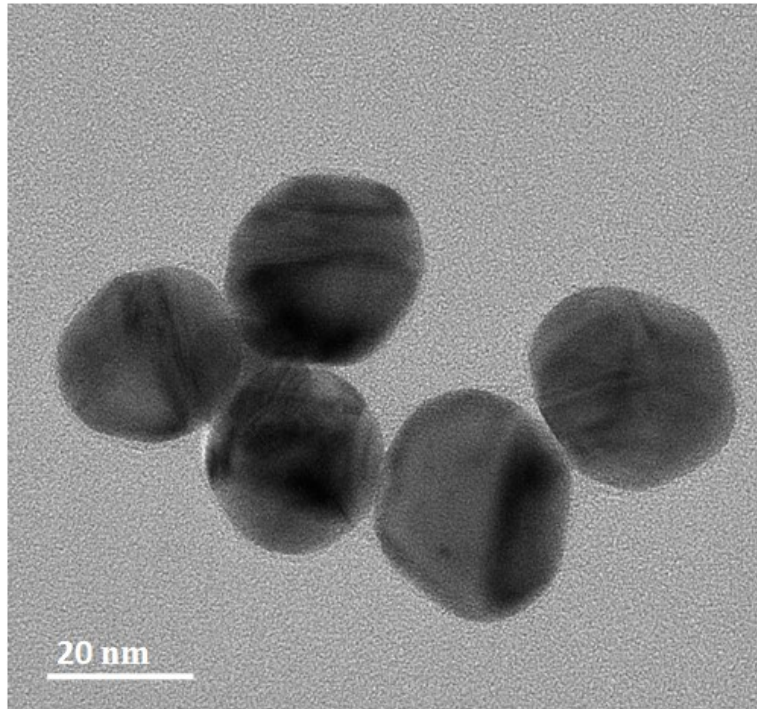

**Figure S2.** HRTEM image of Au NPs.

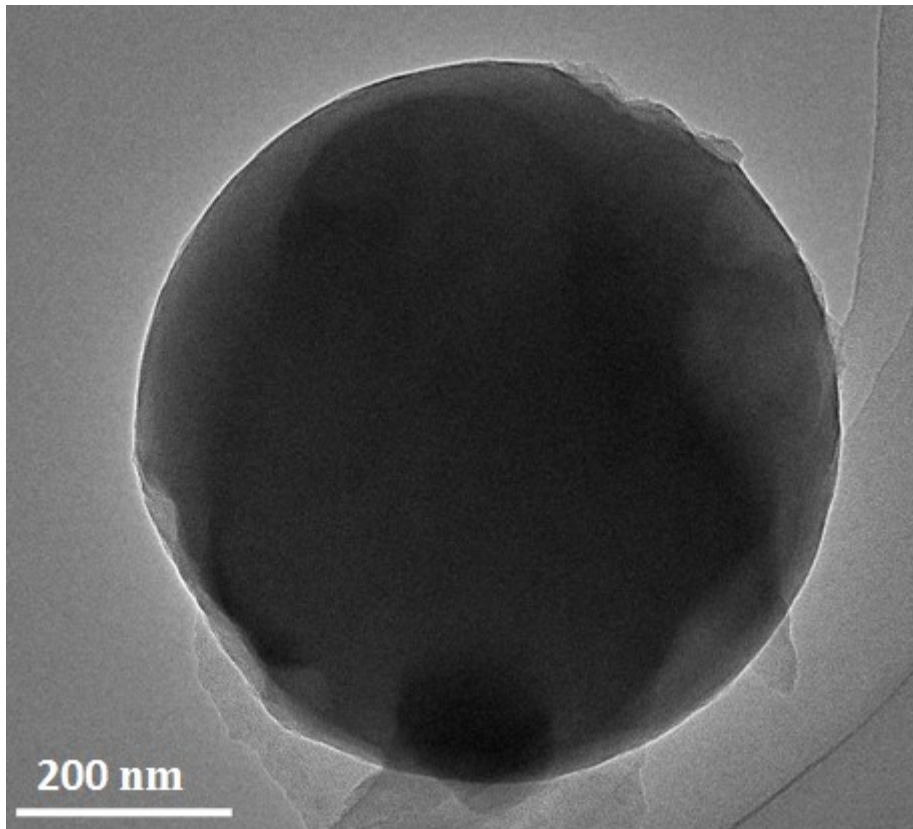

**Figure S3.** TEM image of TiO<sub>2</sub> microspheres.

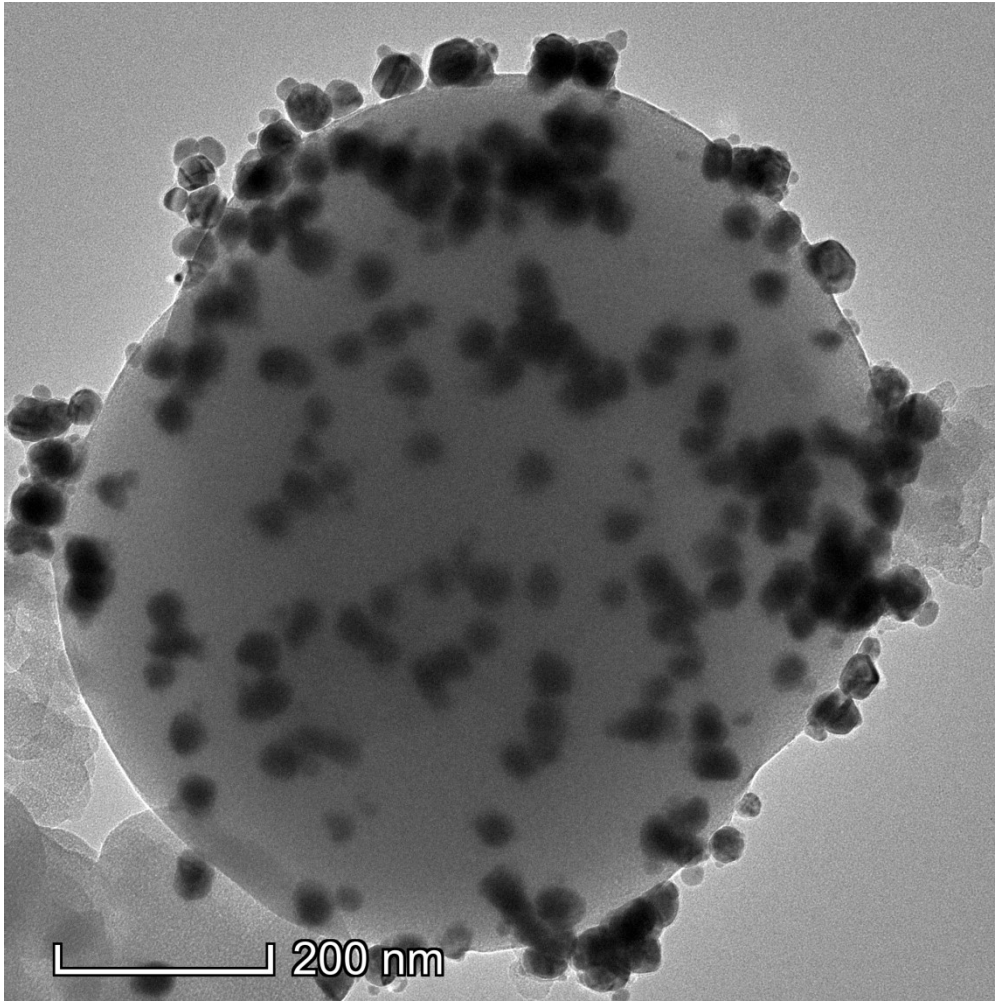

**Figure S4.** TEM image of Au@Ag/TiO<sub>2</sub>.

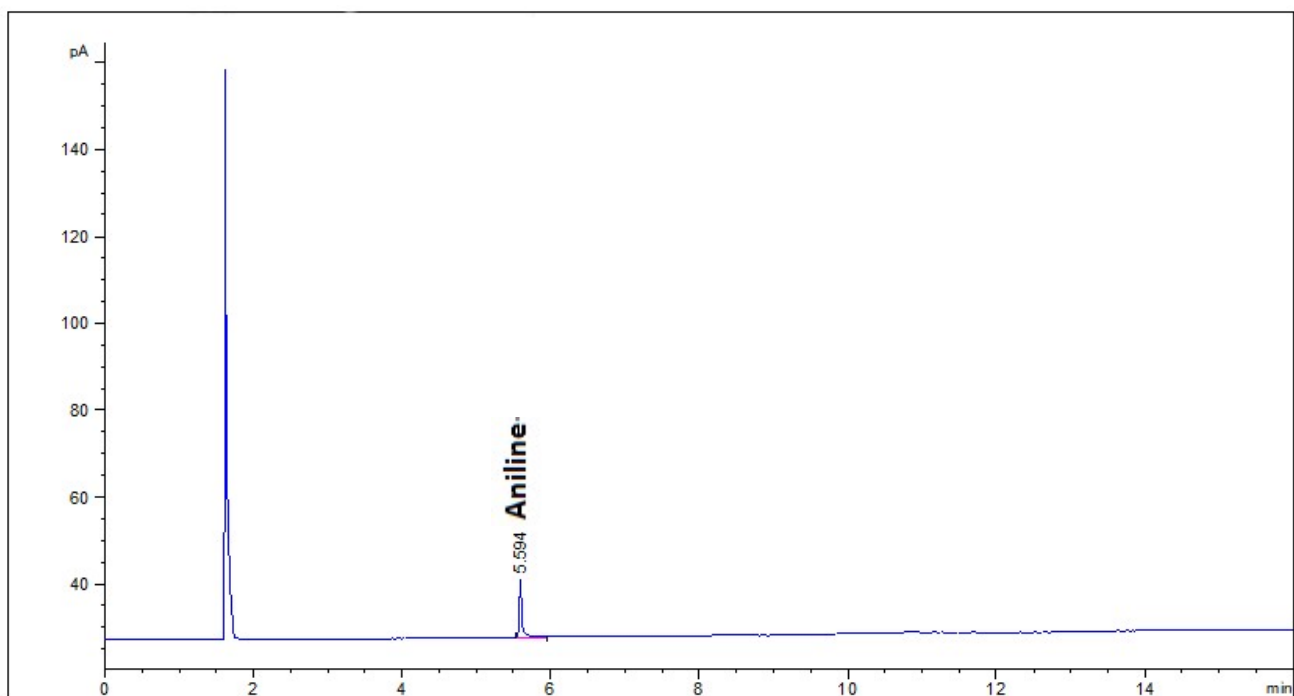

**Figure S5.** The gas chromatography of products after photoreaction of nitrobenzene over Au@Ag/TiO<sub>2</sub>/Ti<sub>3</sub>C<sub>2</sub>.

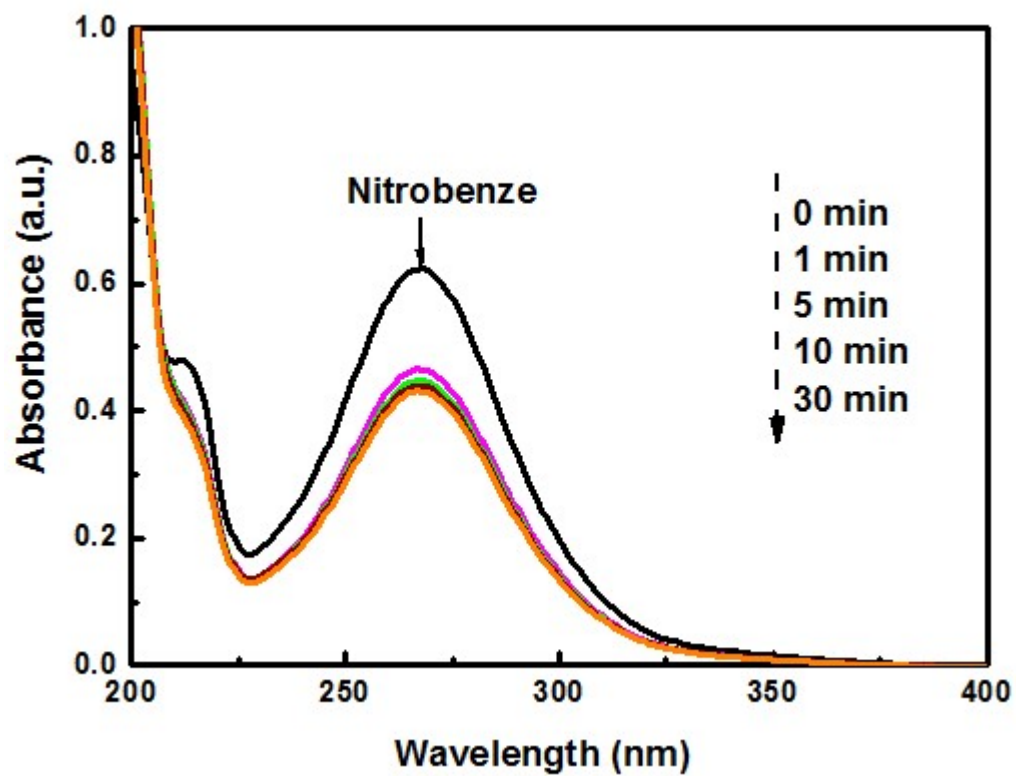

**Figure S6.** UV-vis adsorption spectra of nitrobenzene solution as a function of time over pure TiO<sub>2</sub> microspheres.

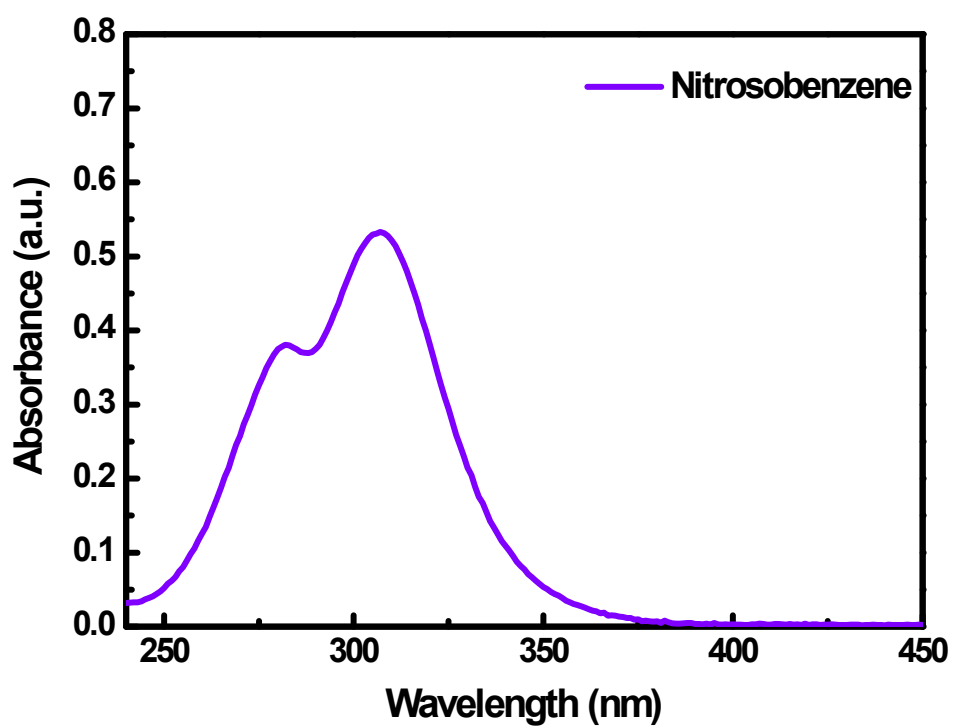

Figure S7. UV-vis adsorption spectra of standard nitrosobenzene.



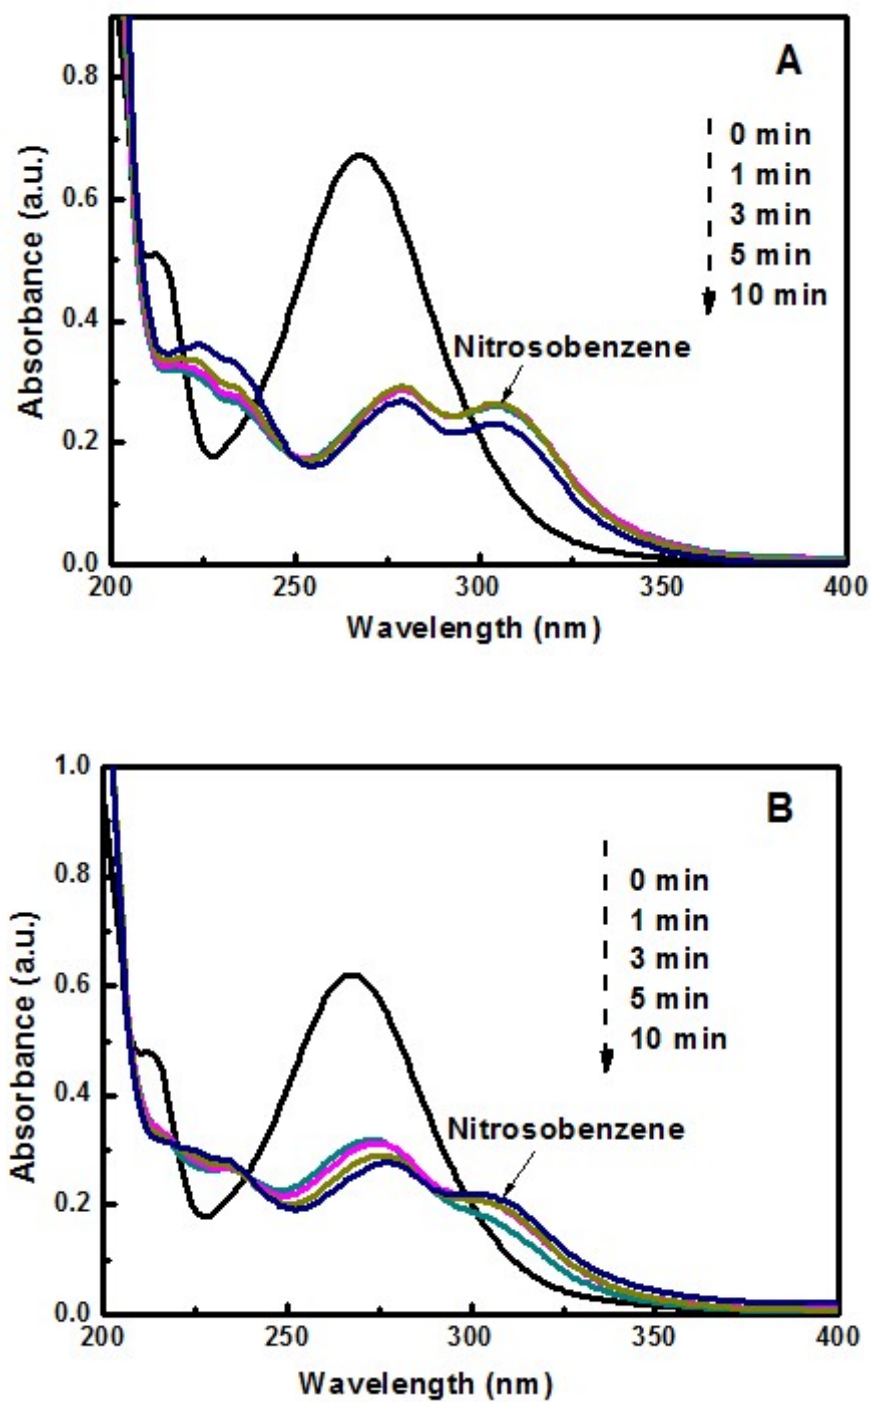

**Figure S8.** UV-vis adsorption spectra of nitrosobenzene solution as a function of time over Ag/TiO<sub>2</sub> (A) and Au/TiO<sub>2</sub> (B).

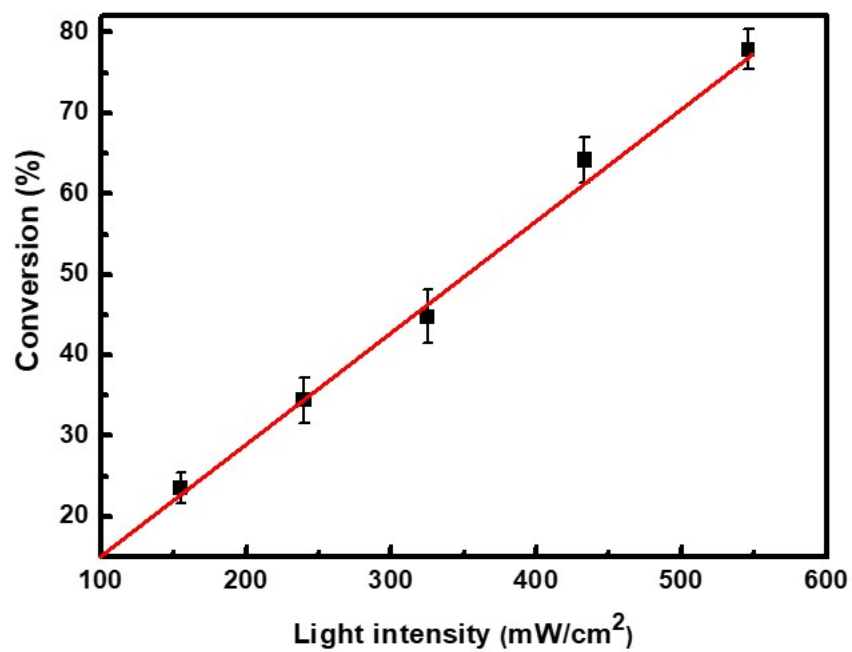

**Figure S9.** Dependence of nitrobenzene conversion on the light intensity over

*Au@Ag/TiO<sub>2</sub>/Ti<sub>3</sub>C<sub>2</sub>.*

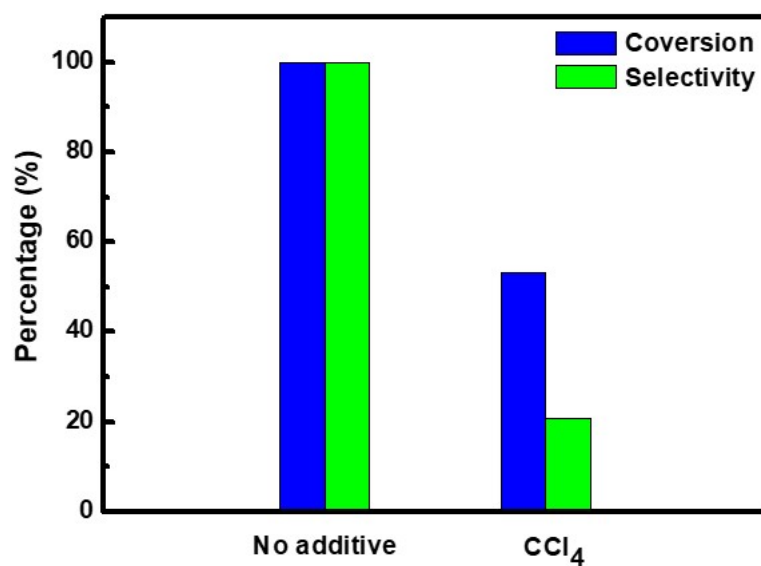

**Figure S10.** Photoreduction activity of Au@Ag/TiO<sub>2</sub>/Ti<sub>3</sub>C<sub>2</sub> with or without 5 μL of CCl<sub>4</sub> under illumination of 5 min.

**Table S1.** The data of conversion and selectivity over various samples displayed in

Figure 7A.

| <b>Samples</b>                                           | <b>Conversion (%)</b> | <b>Selectivity (%)</b> |
|----------------------------------------------------------|-----------------------|------------------------|
| <b>Au/TiO<sub>2</sub></b>                                | <b>87.7</b>           | <b>44.6</b>            |
| <b>Ag/TiO<sub>2</sub></b>                                | <b>82.5</b>           | <b>38.5</b>            |
| <b>Au@Ag/TiO<sub>2</sub></b>                             | <b>95.8</b>           | <b>84.6</b>            |
| <b>Au@Ag/TiO<sub>2</sub>/Ti<sub>3</sub>C<sub>2</sub></b> | <b>100</b>            | <b>100</b>             |

**Table S2.** The data of conversion and selectivity over Au@Ag/TiO<sub>2</sub>/Ti<sub>3</sub>C<sub>2</sub> displayed

in Figure 7C.

| <b>Au@Ag/TiO<sub>2</sub>/Ti<sub>3</sub>C<sub>2</sub></b> | <b>Conversion (%)</b> | <b>Selectivity (%)</b> |
|----------------------------------------------------------|-----------------------|------------------------|
| <b>1st</b>                                               | <b>100</b>            | <b>100</b>             |
| <b>2nd</b>                                               | <b>100</b>            | <b>98.1</b>            |
| <b>3rd</b>                                               | <b>99.8</b>           | <b>96.5</b>            |
| <b>4th</b>                                               | <b>99.3</b>           | <b>97.3</b>            |
| <b>5th</b>                                               | <b>98.4</b>           | <b>93.8</b>            |

**Table S3.** Photocatalytic activity over Au@Ag/TiO<sub>2</sub>/Ti<sub>3</sub>C<sub>2</sub> with different substrates

for mechanistic route study.

| Entry | Substrates     | Time (min) | Conversion (%) | Selectivity (%) |
|-------|----------------|------------|----------------|-----------------|
| 1     | Nitrobenzene   | 5          | 100            | 100             |
| 2     | Nitrosobenzene | 5          | 100            | 99.6            |
